# Supplementary material for: Biological and Chemical Characterization of Musa paradisiaca Leachate
Source: MDPI journal article supplement (doi:10.3390/biology12101326), 2023-10-11
Supplement: s1 [file s1]

Supplementary materials

**Table S1.** Monoclonal antibodies used in immunocytochemical characterization of glycopolymers in tomato seedlings and plants under control and drought stress.

| Glycopolymer   |                         | mAb   | Epitope                                                                               | References |
|----------------|-------------------------|-------|---------------------------------------------------------------------------------------|------------|
| Pectins        | Homogalacturonan        | LM19  | Homogalacturonan with low degree of esterification                                    | [68]       |
|                |                         | LM20  | Homogalacturonan with high degree of esterification                                   |            |
|                | Rhamnogalacturonan I    | LM5   | [ $\beta$ (1-4)galactan]>3 Rhamnogalacturonan I                                       | [69]       |
|                |                         | LM6   | [ $\alpha$ (1-5) highly branched arabinan]5/6 Rhamnogalacturonan I                    | [70]       |
|                |                         | LM16  | B-1,3-linked galactan backbone when substituted with a single $\beta$ -1,6-linked Gal | [68]       |
|                | Xylogalacturonan        | LM8   | Xylogalacturonan associated with cell detachment and separation                       | [71]       |
| Hemicelluloses | Xyloglucan              | LM15  | Xylosylated xyloglucan (XXXG)                                                         | [72]       |
|                |                         | LM25  | Xylosylated/galactosylated xyloglucan (XXLG and XLLG)                                 | [73]       |
|                | Xylan                   | LM10  | Unsubstituted and relatively low-substituted xylan                                    | [74]       |
|                | Heteromanan             | LM21  | $\beta$ (1-4) linked mannan from DP2 to DP5                                           | [75]       |
|                | Arabinogalactan protein | JIM13 | $\beta$ GlcA-(1,3)- $\alpha$ GalA-(1,2)-Rha                                           | [76,77]    |
|                | Extensin                | LM1   | unknown                                                                               | [78]       |

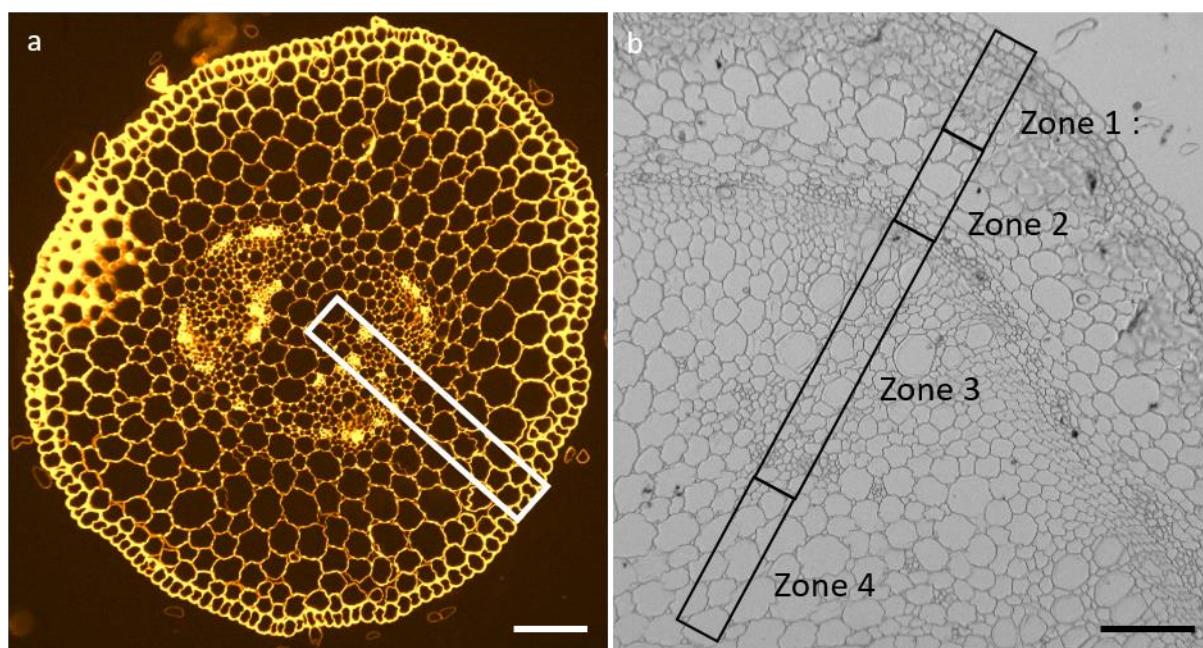

**Figure S1.** Region of interest (ROI) defined for pictures from *in vitro* and phytotron assays. a) *In vitro* assay : cross section of 13-day-old stem tomato seedling. The defined ROI contain all the tissues. b) Phytotron assay : cross section of 45-day-old stem tomato plant. Four ROI were defined as followed : zone 1 : epidermis + peridermis + collenchyma ; zone 2 : cortical parenchyma ;zone 3 : sclerenchyma + xylem + phloem ; zone 4 : medullar parenchyma. Scale bar : 100 $\mu$ m

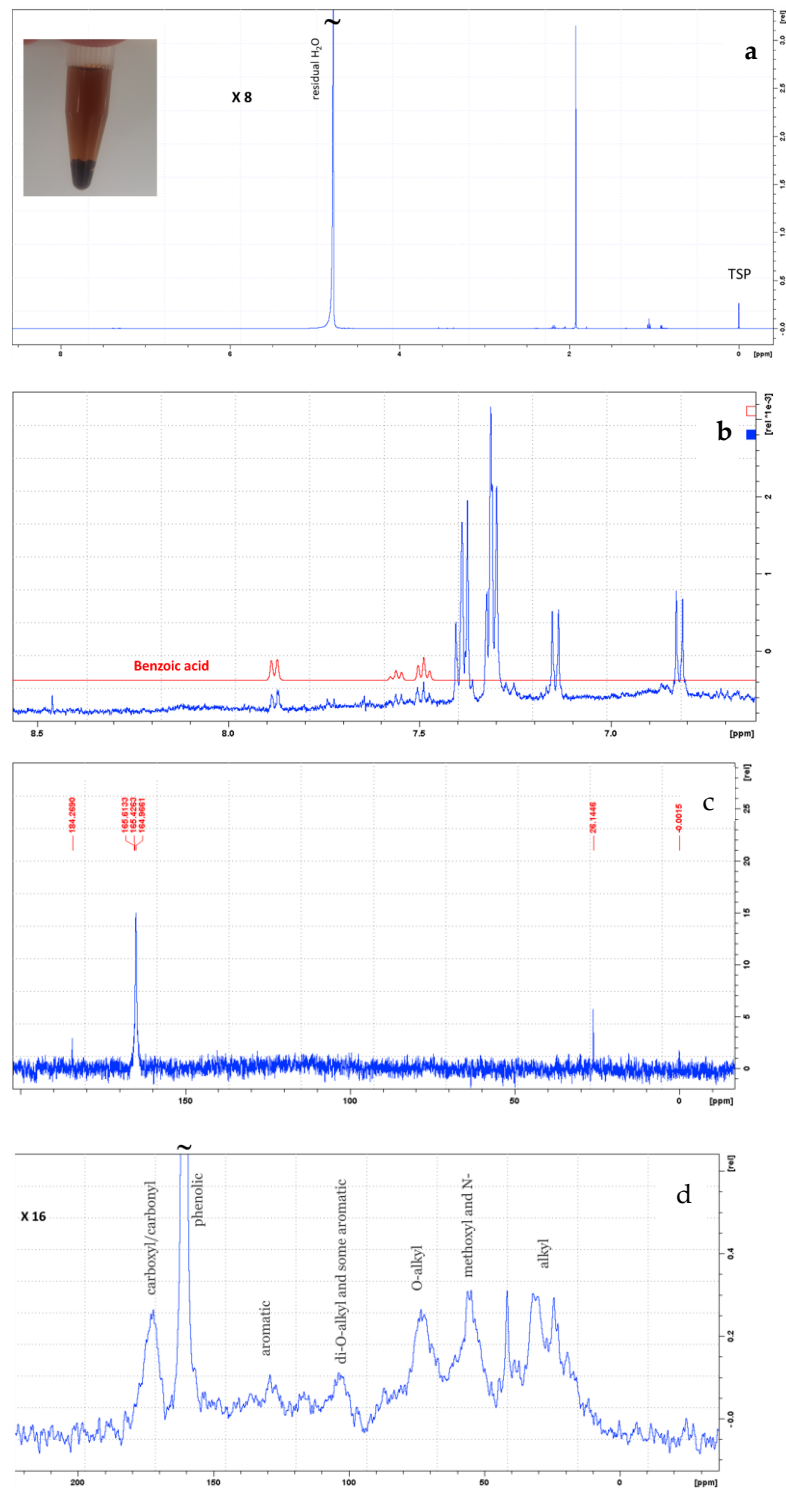

**Figure S2.** Characterization of plantain rachis leachate by liquid-state and solid-state NMR. a) native plantain rachis leachate by  $^1\text{H}$  liquid-state NMR spectrum at 500 MHz. Zoom X8; b) Zoom in aromatic region. Comparison with  $^1\text{H}$  NMR spectrum of benzoic acid (commercial compound) in  $\text{D}_2\text{O}$  pH 6.0 at 500 MHz; c)  $^{13}\text{C}$  NMR spectrum of native plantain rachis leachate at 500 MHz; d) Solid-state  $^1\text{H}/^{13}\text{C}$  MAS NMR spectrum of freeze-dried leachate at 400 MHz. Zoom X16. Putative annotation according to Preston et al.[35].

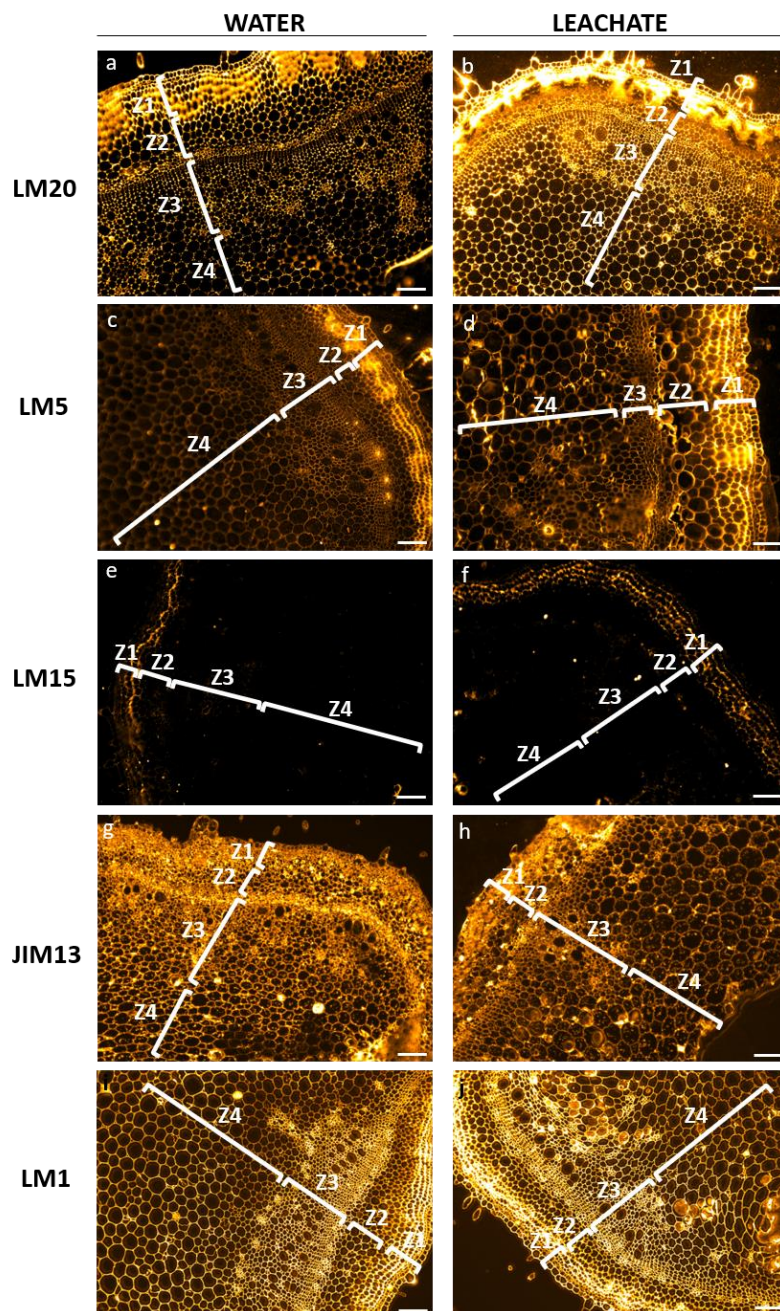

**Figure S3.** Significant immunocytochemical characterization of aerial parts of tomato plant after treatments with leachate and water (according to Mann-Whitney test). LM20, LM5, LM15, JIM13 and LM1: primary antibodies against glycopolymers epitopes.

|                                          |                         |       | In vitro assay |               |        |
|------------------------------------------|-------------------------|-------|----------------|---------------|--------|
|                                          |                         |       | Control        | Leachate      | pvalue |
| Pectins                                  | Homogalacturonan        | LM19  | 461.5 ±119.1   | 397.6 ±65.7   | 0.279  |
|                                          |                         | LM20  | 1101.9 ±505.8  | 1332.0 ±579.1 | 0.516  |
|                                          | Rhamnogalacturonan I    | LM5   | 644.8 ±67.9    | 702.0 ±135.8  | 0.569  |
|                                          |                         | LM6   | 447.4 ±49.1    | 481.8 ±30.2   | 0.279  |
|                                          | Xylogalacturonan        | LM8   | 371.9 ±46.2    | 406.8 ±127.3  | 0.871  |
| Hemicelluloses                           | Xyloglucan              | LM15  | 429.7 ±55.5    | 492.7 ±193.6  | 0.589  |
|                                          |                         | LM25  | 502.6 ±61.9    | 493.1 ±50.7   | 0.626  |
|                                          | Xylan                   | LM10  | 412.6 ±45.7    | 406.5 ±39.4   | 0.663  |
|                                          | Heteromanan             | LM21  | 384.4 ±31.4    | 424.3 ±122.3  | 0.957  |
| Hydroxyproline rich glycoproteins (HRGP) | Arabinogalactan protein | JIM13 | 720.8 ±89.7    | 803.2 ±237.2  | 0.914  |
|                                          |                         | LM16  | 346.7 ±12.4    | 356.6 ±29.4   | 0.845  |
|                                          | Extensin                | LM1   | 380.1 ±30.3    | 425.7 ±64.2   | 0.279  |

|                                          |                         | Phytotron assay |               |               |         |              |              |         |               |               |         |             |              |       |
|------------------------------------------|-------------------------|-----------------|---------------|---------------|---------|--------------|--------------|---------|---------------|---------------|---------|-------------|--------------|-------|
|                                          |                         | Z1              |               |               | Z2      |              |              | Z3      |               |               | Z4      |             |              |       |
|                                          |                         | Control         | Leachate      | pvalue        | Control | Leachate     | pvalue       | Control | Leachate      | pvalue        | Control | Leachate    | pvalue       |       |
| Pectins                                  | Homogalacturonan        | LM19            | 294.2 ±71.2   | 329.7 ±190.3  | 0.787   | 213.2 ±27.6  | 202.7 ±61.0  | 0.516   | 271.1 ±88.8   | 284.4 ±121.3  | 0.746   | 163.7 ±27.4 | 171.2 ±47.4  | 0.516 |
|                                          |                         | LM20            | 897.9 ±367.2  | 985.6 ±634.6  | 0.805   | 409.9 ±100.9 | 489.9 ±250.9 | 0.671   | 292.3 ±80.6   | 414.4 ±54.3   | 0.020   | 279.9 ±91.6 | 362.8 ±142.9 | 0.376 |
|                                          | Rhamnogalacturonan I    | LM5             | 942.9 ±108.3  | 1075.1 ±105.6 | 0.045   | 418.8 ±58.5  | 480.1 ±51.4  | 0.160   | 474.1 ±51.8   | 501.6 ±63.3   | 0.516   | 294.8 ±46.8 | 316.3 ±38.7  | 0.387 |
|                                          |                         | LM6             | 1922.9 ±354.9 | 1952.4 ±367.7 | 1.000   | 858.1 ±137.0 | 965.0 ±311.6 | 0.596   | 1231.2 ±220.9 | 1510.5 ±643.4 | 0.724   | 646.2 ±75.8 | 694.3 ±141.5 | 0.548 |
|                                          | Xylogalacturonan        | LM8             | 252.4 ±79.3   | 233.8 ±50.9   | 0.808   | 166.9 ±27.1  | 190.1 ±34.6  | 0.230   | 169.8 ±26.8   | 197.2 ±49.6   | 0.330   | 141.4 ±11.5 | 186.6 ±70.7  | 0.214 |
| Hemicelluloses                           | Xyloglucan              | LM15            | 294.8 ±86.3   | 457.8 ±108.5  | 0.045   | 185.9 ±38.0  | 243.4 ±68.3  | 0.045   | 225.4 ±68.8   | 270.1 ±103.9  | 0.482   | 146.7 ±6.8  | 178.1 ±56.4  | 1.00  |
|                                          |                         | LM25            | 441.8 ±70.5   | 534.1 ±168.1  | 0.589   | 242.7 ±20.6  | 283.5 ±43.5  | 0.176   | 324.7 ±29.5   | 348.0 ±69.9   | 0.914   | 158.1 ±13.8 | 185.9 ±35.0  | 0.144 |
|                                          | Xylan                   | LM10            | ND            | ND            | ND      | ND           | ND           | ND      | ND            | ND            | ND      | ND          | ND           | ND    |
|                                          | Heteromanan             | LM21            | 217.7 ±17.1   | 230.1 ±42.3   | 0.922   | 159.7 ±15.7  | 173.1 ±33.9  | 0.433   | 187.0 ±21.7   | 165.1 ±8.1    | 0.327   | 137.7 ±5.3  | 142.6 ±10.8  | 0.433 |
| Hydroxyproline rich glycoproteins (HRGP) | Arabinogalactan protein | JIM13           | 419.9 ±80.9   | 658.3 ±78.6   | 0.011   | 385.5 ±46.4  | 313.8 ±28.5  | 0.013   | 421.1 ±84.2   | 431.5 ±70.5   | 0.914   | 234.5 ±79.0 | 239.7 ±41.1  | 0.387 |
|                                          |                         | LM16            | ND            | ND            | ND      | ND           | ND           | ND      | ND            | ND            | ND      | ND          | ND           | ND    |
|                                          | Extensin                | LM1             | 580.1 ±115.2  | 656.0 ±153.0  | 0.266   | 451.4 ±76.9  | 447.4 ±65.9  | 0.923   | 473.7 ±40.8   | 564.3 ±29.8   | 0.040   | 367.8 ±50.9 | 373.2 ±40.5  | 0.480 |

**Figure S4.** Effect of leachate application under drought stress on cell wall imaging in *in vitro* and phytotron assays. Values (in arbitrary unit) in squares correspond to leachate or control induced increase or decrease in glycopolymers epitopes detection. The p-value is referred according to the Mann-Whitney Test. The color squares differ significantly based on the Mann-Whitney Test. In green a significant increase compared to the control; in red a significant decrease compared to the control; in gray not significant. (Z1) zone 1: epidermis + peridermis + collenchyma; (Z2) zone 2: cortical parenchyma; (Z3) zone 3: sclerenchyma + xylem + phloem; (Z4) zone 4: medullar parenchyma. Each condition was replicated was replicated in 3 independent biological replicates. ND: not detected.

## Supplemental data

ImageJ macro developed for fluorescence measurements :

```
open();
path = getDirectory("image");
nomLong=getTitle();
nomCourt=File.getNameWithoutExtension(path+nomLong);
getDimensions(width, height, channels, slices, frames);
getPixelSize(unit, pixelWidth, pixelHeight);
if (slices>1) {
    run("Z Project...", "projection=[Average Intensity]");
}

run("Enhance Contrast", "saturated=0.35");
//run("Z Project...", "projection=[Sum Slices]");
makeLine(460, 712, 3844, 2008);
waitForUser("Settings", "Please adjust the line to the region you need \nand be sure it is
wide enough. \n\nThen, press OK");

// Get profile and display values in "Results" window
run("Clear Results");
profile = getProfile();
for (i=0; i<profile.length; i++){
    setResult("Distance", i, i*pixelWidth);
    setResult("Value", i, profile[i]);
    updateResults;
}

saveAs("Results", path+nomCourt+".csv");

// Plot profile

Plot.create("Profile", "X", "Value", profile);

run("Close All");
selectWindow("Results");
run("Close");
```
